# Supplementary material
Source: MDPI journal article supplement (https://www.mdpi.com/2311-5637/9/4/397)
Supplement: s1 [file s1 › fermentation-2321053-supplementary.pdf]

| RT     | Response | Ar/H  | RFact | ECL    | PeakName         | Percent | Comment1            | Comment2            |
|--------|----------|-------|-------|--------|------------------|---------|---------------------|---------------------|
| 0.7180 | 343882   | 0.004 | ----  | 6.6188 |                  | ----    | < min rt            |                     |
| 0.7257 | 1.023E+9 | 0.019 | ----  | 6.6688 | SOLVENT PEAK     | ----    | < min rt            |                     |
| 1.5846 | 728      | 0.009 | 1.081 | 11.619 | 12:0 iso         | 0.39    | ECL deviates -0.002 | Reference -0.003    |
| 1.6750 | 390      | 0.009 | 1.061 | 11.999 | 12:0             | 0.21    | ECL deviates 0.000  | Reference -0.001    |
| 1.8443 | 12351    | 0.009 | 1.033 | 12.624 | 13:0 iso         | 6.39    | ECL deviates 0.002  | Reference 0.001     |
| 1.8691 | 1879     | 0.009 | 1.029 | 12.716 | 13:0 anteiso     | 0.97    | ECL deviates 0.002  | Reference 0.001     |
| 2.1325 | 7098     | 0.009 | 0.994 | 13.628 | 14:0 iso         | 3.53    | ECL deviates 0.000  | Reference -0.001    |
| 2.2424 | 6286     | 0.009 | 0.982 | 13.998 | 14:0             | 3.09    | ECL deviates -0.001 | Reference -0.002    |
| 2.4396 | 72723    | 0.009 | 0.964 | 14.631 | 15:0 iso         | 35.12   | ECL deviates 0.000  | Reference -0.001    |
| 2.4685 | 11547    | 0.009 | 0.961 | 14.724 | 15:0 anteiso     | 5.56    | ECL deviates 0.000  | Reference -0.002    |
| 2.5298 | 759      | 0.010 | 0.956 | 14.921 | 15:1 w5c         | 0.36    | ECL deviates -0.005 |                     |
| 2.5544 | 1516     | 0.009 | ----  | 15.000 | 15:0             | ----    | ECL deviates 0.000  |                     |
| 2.6869 | 1109     | 0.010 | 0.946 | 15.415 | 16:1 w7c alcohol | 0.53    | ECL deviates 0.001  |                     |
| 2.7166 | 5436     | 0.010 | 0.944 | 15.507 | Sum In Feature 2 | 2.57    | ECL deviates -0.007 | 14:0 3OH/16:1 iso I |
| 2.7570 | 11699    | 0.010 | 0.941 | 15.634 | 16:0 iso         | 5.52    | ECL deviates 0.001  | Reference -0.001    |
| 2.7859 | 527      | 0.010 | 0.940 | 15.724 | 16:0 anteiso     | 0.25    | ECL deviates -0.002 |                     |
| 2.8046 | 918      | 0.012 | 0.939 | 15.783 | 16:1 w11c        | 0.43    | ECL deviates 0.001  |                     |
| 2.8348 | 16641    | 0.009 | 0.937 | 15.877 | Sum In Feature 3 | 7.81    | ECL deviates 0.003  | 16:1 w6c/16:1 w7c   |
| 2.8738 | 9220     | 0.009 | 0.935 | 15.999 | 16:0             | 4.32    | ECL deviates 0.000  | Reference -0.003    |
| 2.9571 | 1653     | 0.013 | 0.931 | 16.260 | 15:0 2OH         | 0.77    | ECL deviates 0.006  |                     |
| 2.9917 | 570      | 0.010 | ----  | 16.369 |                  | ----    |                     |                     |
| 3.0068 | 4609     | 0.010 | 0.929 | 16.416 | 17:1 iso w10c    | 2.14    | ECL deviates 0.002  |                     |
| 3.0295 | 11014    | 0.010 | 0.928 | 16.487 | 17:1 iso w5c     | 5.12    | ECL deviates 0.005  |                     |
| 3.0539 | 4690     | 0.012 | 0.926 | 16.564 | 17:1 anteiso A   | 2.18    | ECL deviates -0.007 |                     |
| 3.0769 | 20368    | 0.010 | 0.926 | 16.636 | 17:0 iso         | 9.45    | ECL deviates -0.001 | Reference -0.005    |
| 3.1075 | 4369     | 0.010 | 0.924 | 16.732 | 17:0 anteiso     | 2.02    | ECL deviates -0.001 | Reference -0.005    |
| 3.1930 | 362      | 0.011 | 0.921 | 16.999 | 17:0             | 0.17    | ECL deviates 0.000  | Reference -0.005    |
| 3.4447 | 650      | 0.013 | 0.915 | 17.795 | 18:1 w9c         | 0.30    | ECL deviates 0.001  |                     |
| 3.5098 | 1737     | 0.011 | 0.913 | 18.001 | 18:0             | 0.79    | ECL deviates 0.001  | Reference -0.005    |
| 4.0186 | 934      | 0.013 | ----  | 19.660 |                  | ----    |                     |                     |
| ----   | 5436     | ----  | ----  | ----   | Summed Feature 2 | 2.57    | 12:0 aldehyde ?     | unknown 10.9525     |
| ----   | ----     | ----  | ----  | ----   | ----             | ----    | 16:1 iso I/14:0 3OH | 14:0 3OH/16:1 iso I |
| ----   | 16641    | ----  | ----  | ----   | Summed Feature 3 | 7.81    | 16:1 w7c/16:1 w6c   | 16:1 w6c/16:1 w7c   |

ECL Deviation: 0.003  
Total Response: 210266  
Percent Named: 99.28%

Reference ECL Shift: 0.003  
Total Named: 208763  
Total Amount: 199574

Number Reference Peaks: 14

Matches:

| Library     | Sim Index | Entry Name                         |
|-------------|-----------|------------------------------------|
| RTSBA6 6.21 | 0.777     | Bacillus-cereus-GC subgroup A      |
|             | 0.549     | Bacillus-thuringiensis-kurstakii   |
|             | 0.542     | Bacillus-thuringiensis-israelensis |

Figure S1. Fatty acid analysis results of strain A2

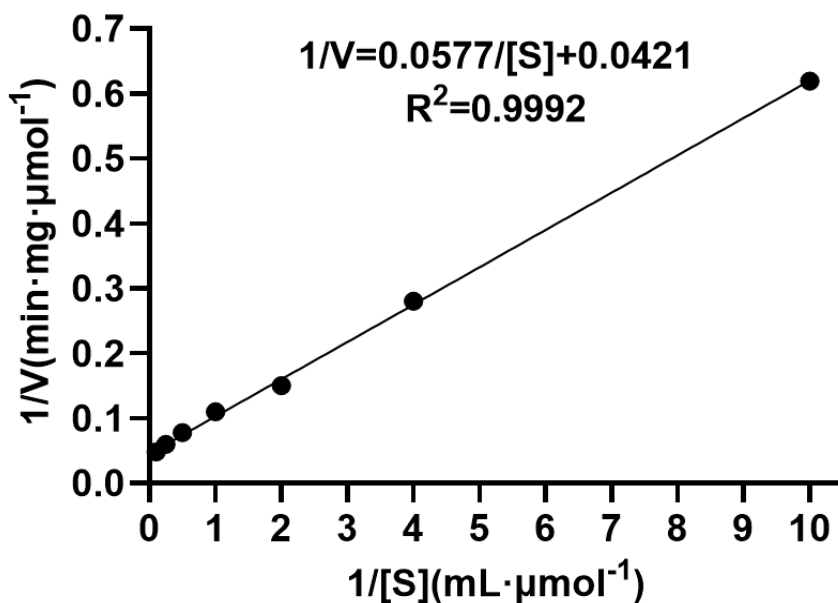

Figure S2. The Lineweaver-Burk plot
